# Supplementary material for: Gene Editing of the Follicle-Stimulating Hormone Gene to Sterilize Channel Catfish, Ictalurus punctatus, Using a Modified Transcription Activator-like Effector Nuclease Technology with Electroporation
Source: MDPI journal article supplement (doi:10.3390/biology12030392), 2023-03-01
Supplement: s1 [file s1]

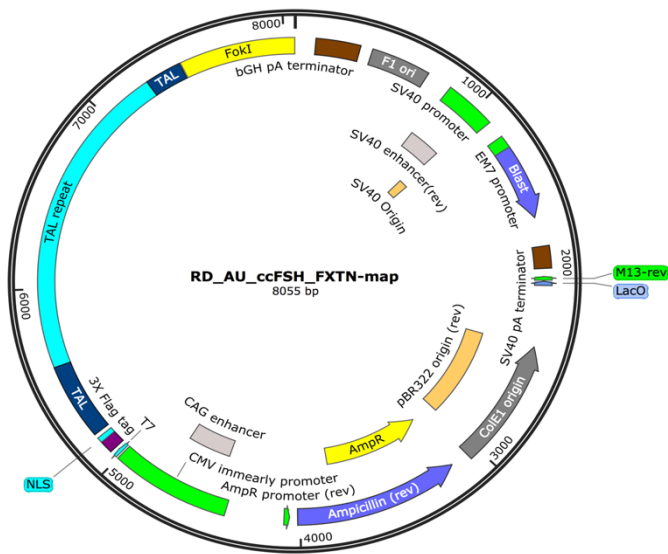

**Figure S1.** Schematic representation of transcription activator-like effector nucleases (TALENs) plasmid structure targeting follicle-stimulating hormone (*fsh*) gene of channel catfish (*Ictalurus punctatus*). *CMV prmt* cytomegalovirus promoter, *NLS* nuclear localization signal, *BGH pA* bovine growth hormone polyadenylation signal, *AmpR* ampicillin resistance gene.

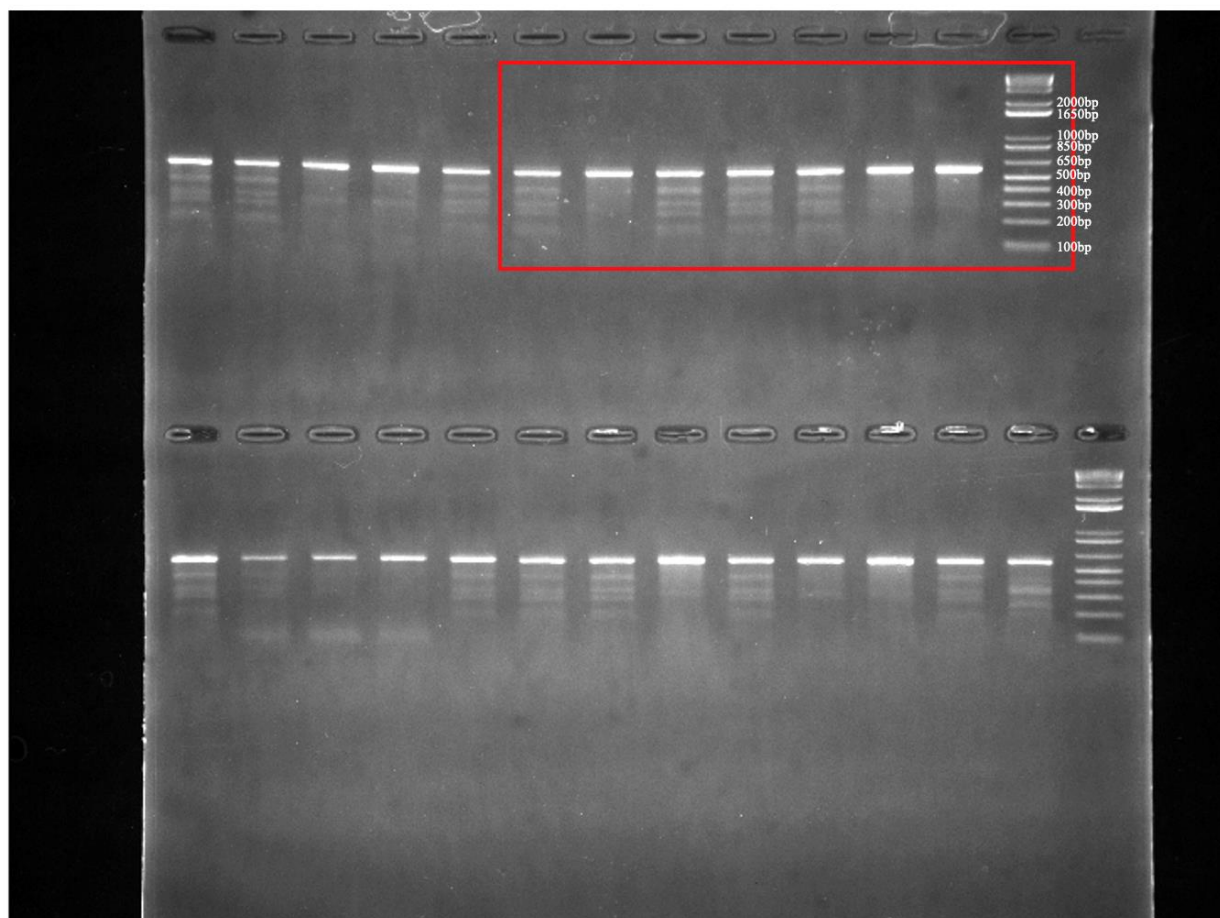

**Figure S2.** Original images of gels. The result of Surveyor mutation detection in Fig. 1 was shown. Red box represents the cropped area.

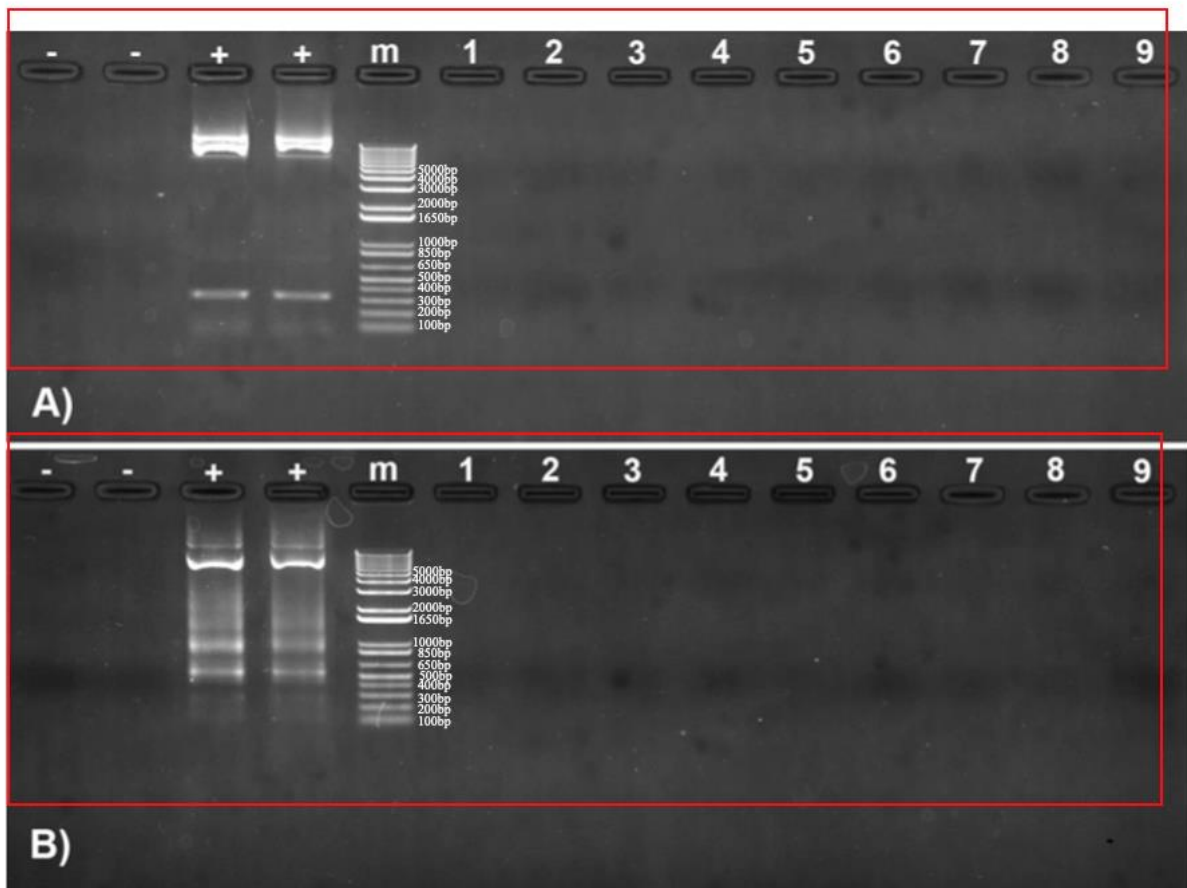

**Figure S3.** Original images of gels. The result of PCR inspection in Fig. 3 was shown. Red box represents the cropped area.

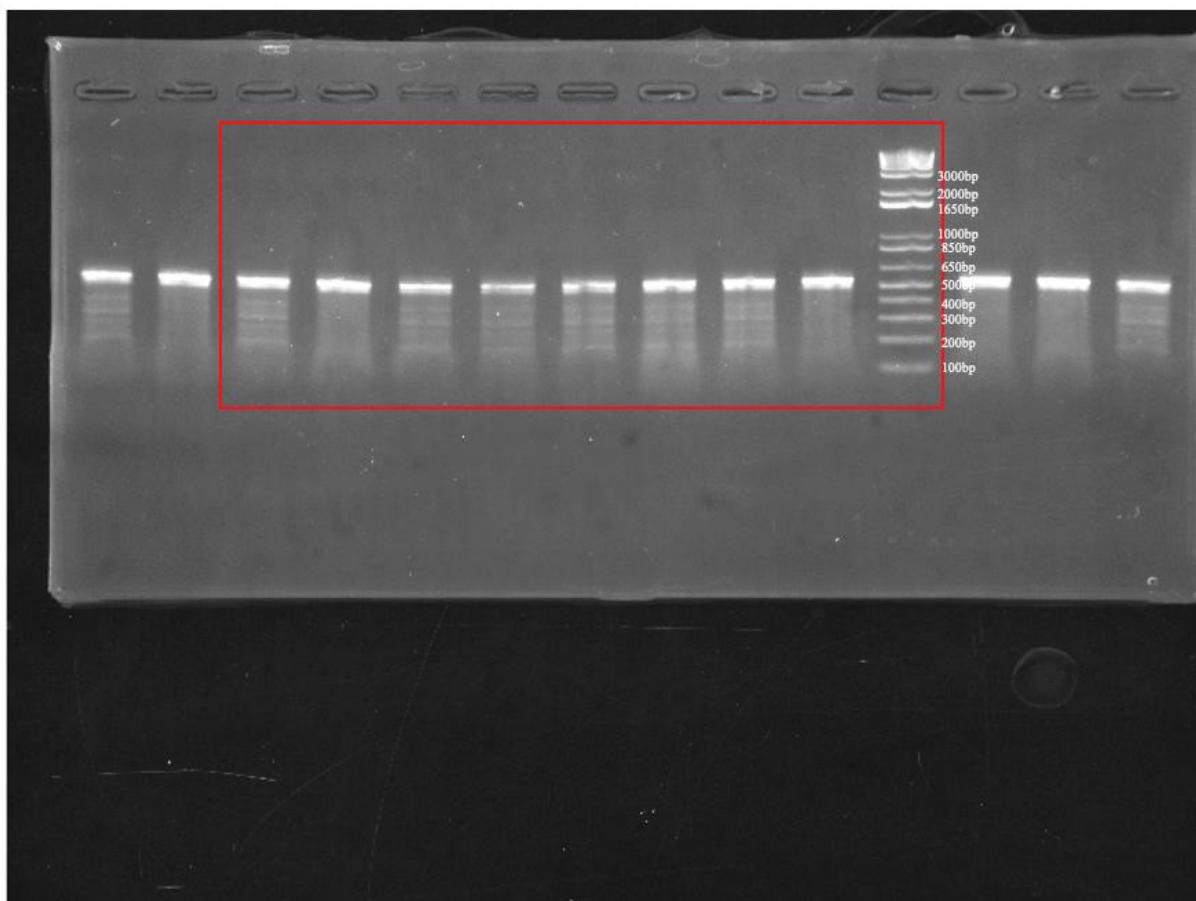

**Figure S4.** Original images of gels. The result of Surveyor mutation detection in Fig. 4 was shown. Red box represents the cropped area.

**Table S1.** Primer sequences used for the amplification of follicle-stimulating hormone (*fsh*), cytomegalovirus (CMV) promoter, and transcription activator-like (TAL) repeats regions in channel catfish (*Ictalurus punctatus*).

| Targeting site       | Sequence                    | Annealing temperature | Product length (bp) |
|----------------------|-----------------------------|-----------------------|---------------------|
| <i>fsh</i> Forward   | 5'-CACAACTCCAGCTGTGACAA-3'  | 60 °C                 | 550                 |
| <i>fsh</i> Reverse   | 5'-CAGAATTCCGTGGCCATTTA-3'  |                       |                     |
| CMV promoter Forward | 5'-AACAACAACGGCGGTAAG-3'    | 60 °C                 | 114                 |
| CMV promoter Reverse | 5'-CCCATTATTGTTTCGCGATTG-3' |                       |                     |
| TAL Repeats Forward  | 5'-GCATGACGGAGGGAAAC-3'     | 60 °C                 | 215                 |
| TAL Repeats Reverse  | 5'-CCATTATTGTTTCGCGATTGA-3' |                       |                     |
